# Supplementary material for: Chemokine receptors coordinately regulate macrophage dynamics and mammary gland development
Source: PubMed Central journal article supplement (PMC7328164; doi:10.1242/dev.187815), 2020-06-17
Supplement: develop-147-187815-s1.pdf [file develop-147-187815-s1.pdf]

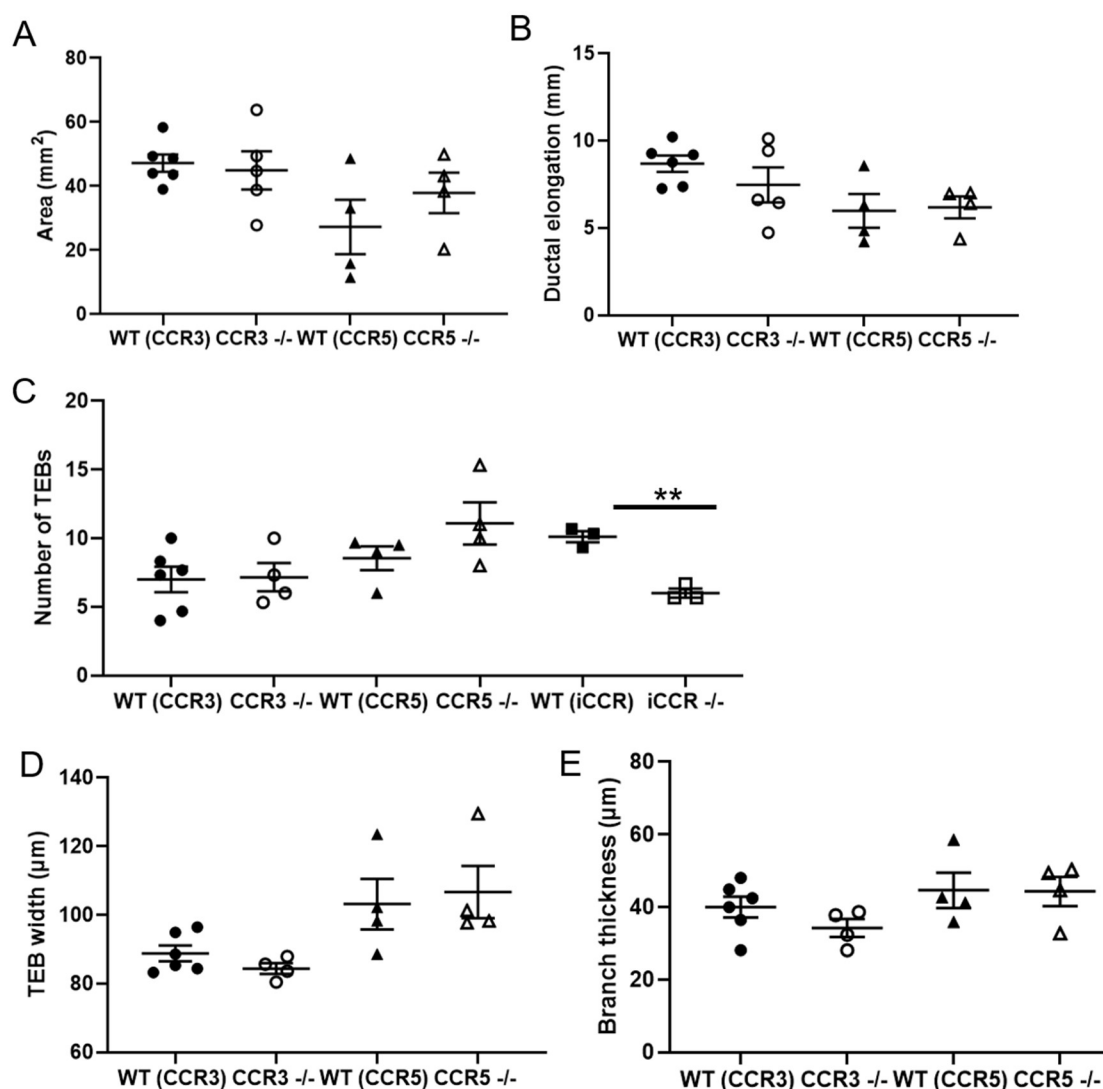

**Figure S1: CCR3 and CCR5 do not control the extent of branching**

**morphogenesis.** Branching morphogenesis in carmine alum whole mounts were quantified in 7 weeks old mammary glands; (WT (CCR3) n=6, CCR3<sup>-/-</sup> n= 5; WT (CCR5) n=4, CCR5<sup>-/-</sup> n= 4).

**(A)** the area of branching from the inguinal lymph node, **(B)** ductal elongation, measured from the middle of the inguinal lymph node to the furthest edge of ductal outgrowth. **(C)** The number of TEBs, was determined as the average number from at least 2 individual fields of view (FOV) (5×) per gland. WT (iCCR) n=3, iCCR<sup>-/-</sup> n= 3), two-tailed t-test (p=0.0014). **(D)** The average width of all TEBs was determined from at least 2 F.O.V (5x) per gland. **(E)** Branch thickness was determined as the average of 3 measurements from 6 x F.O.V (5x) per gland. Error bars represent S.E.M.

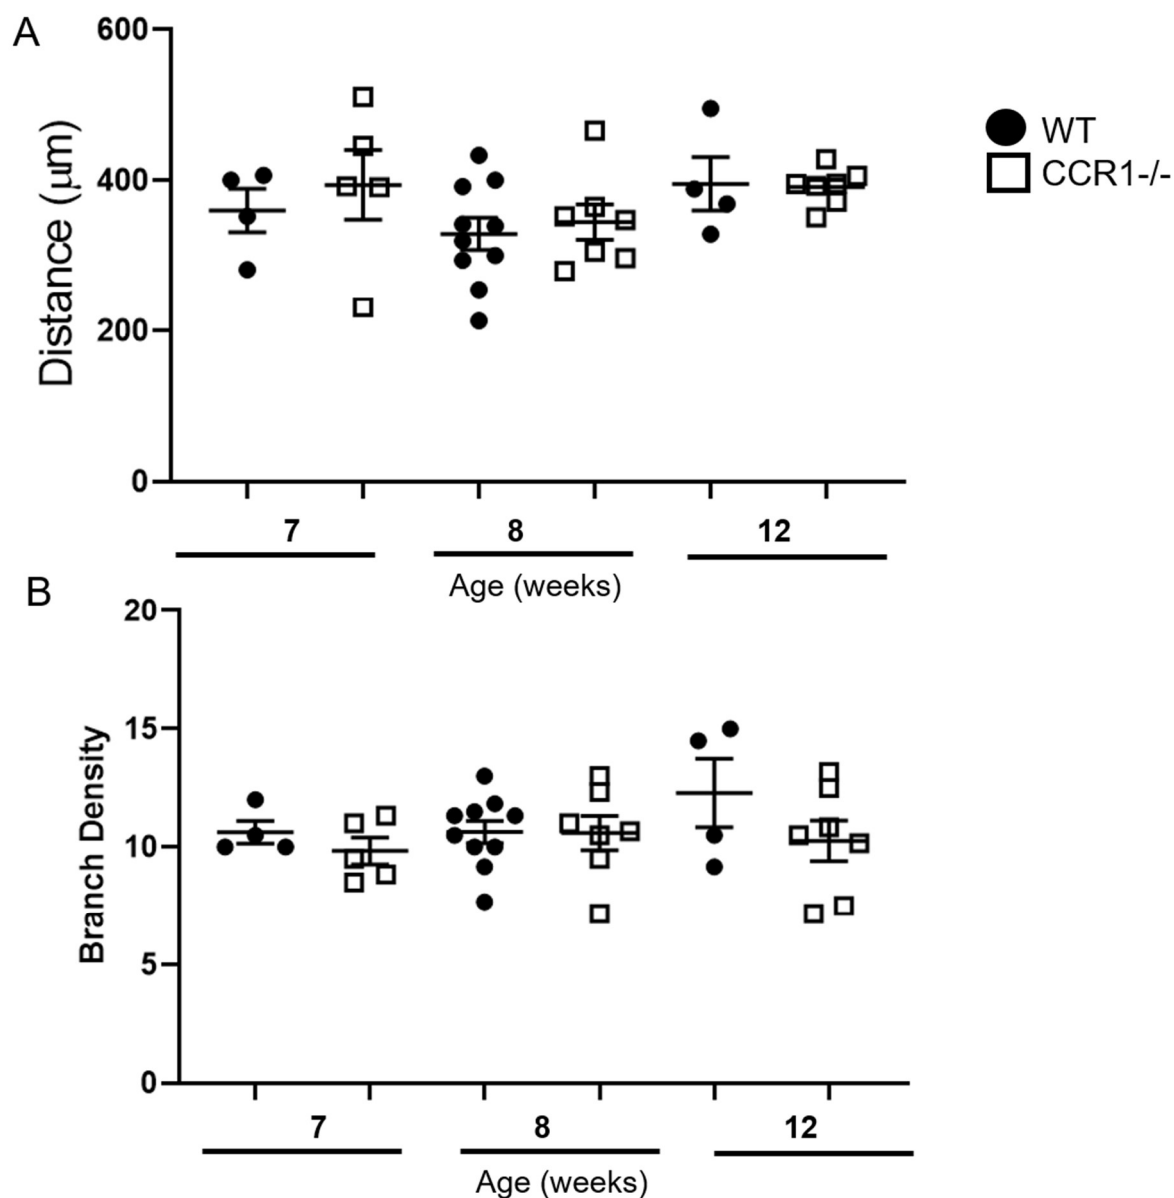

**Figure S2: Branch density is unaffected in CCR1<sup>-/-</sup> mice.** Branching morphogenesis in carmine alum whole mounts were quantified in 7 (WT n=4, CCR1<sup>-/-</sup> n= 5), 8 (WT n=10, CCR1<sup>-/-</sup> n= 7) and 12 (WT n=4, CCR1<sup>-/-</sup> n= 7) week mammary glands; in terms of **(A)** the distance between branches, and **(B)** the number of branches in a 5 x F.O.V. Each data point represents the average of 3 measurements from 6 individual F.O.V. per gland. Error bars represent S.E.M.

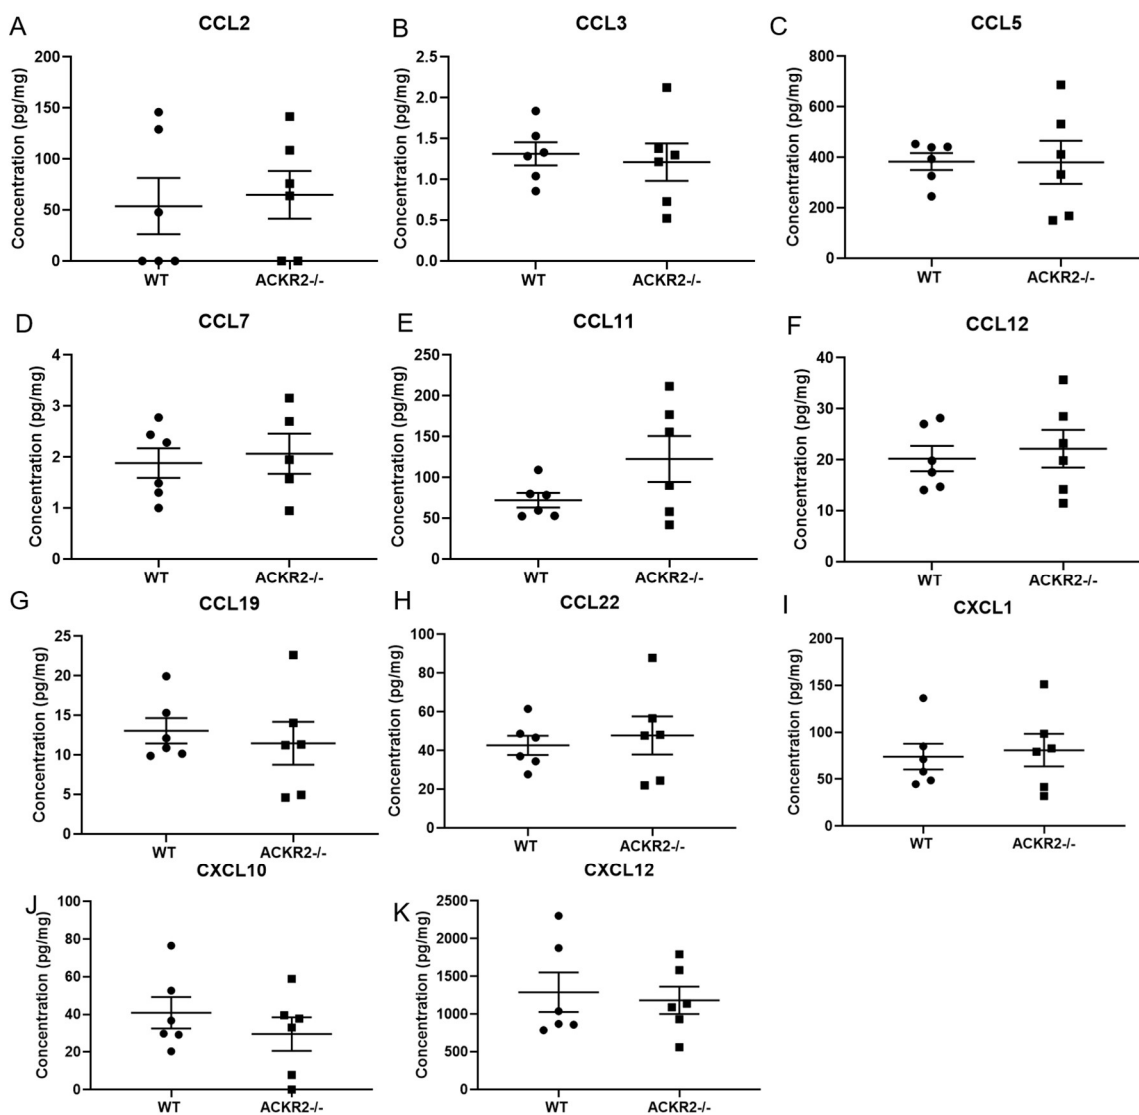

**Figure S3: Chemokine levels in the male fat pad are unaffected in the absence of ACKR2.**

Multiplex measurement of protein concentration of **(A)** CCL2, **(B)** CCL3, **(C)** CCL5, **(D)** CCL7, **(E)** CCL11, **(F)** CCL12, **(G)** CCL19, **(H)** CCL22, **(I)** CXCL1, **(J)** CXCL10 and **(K)** CXCL12 in whole fat pad homogenates. WT n=6, and ACKR2<sup>-/-</sup> n=6. Error bars represent S.E.M.

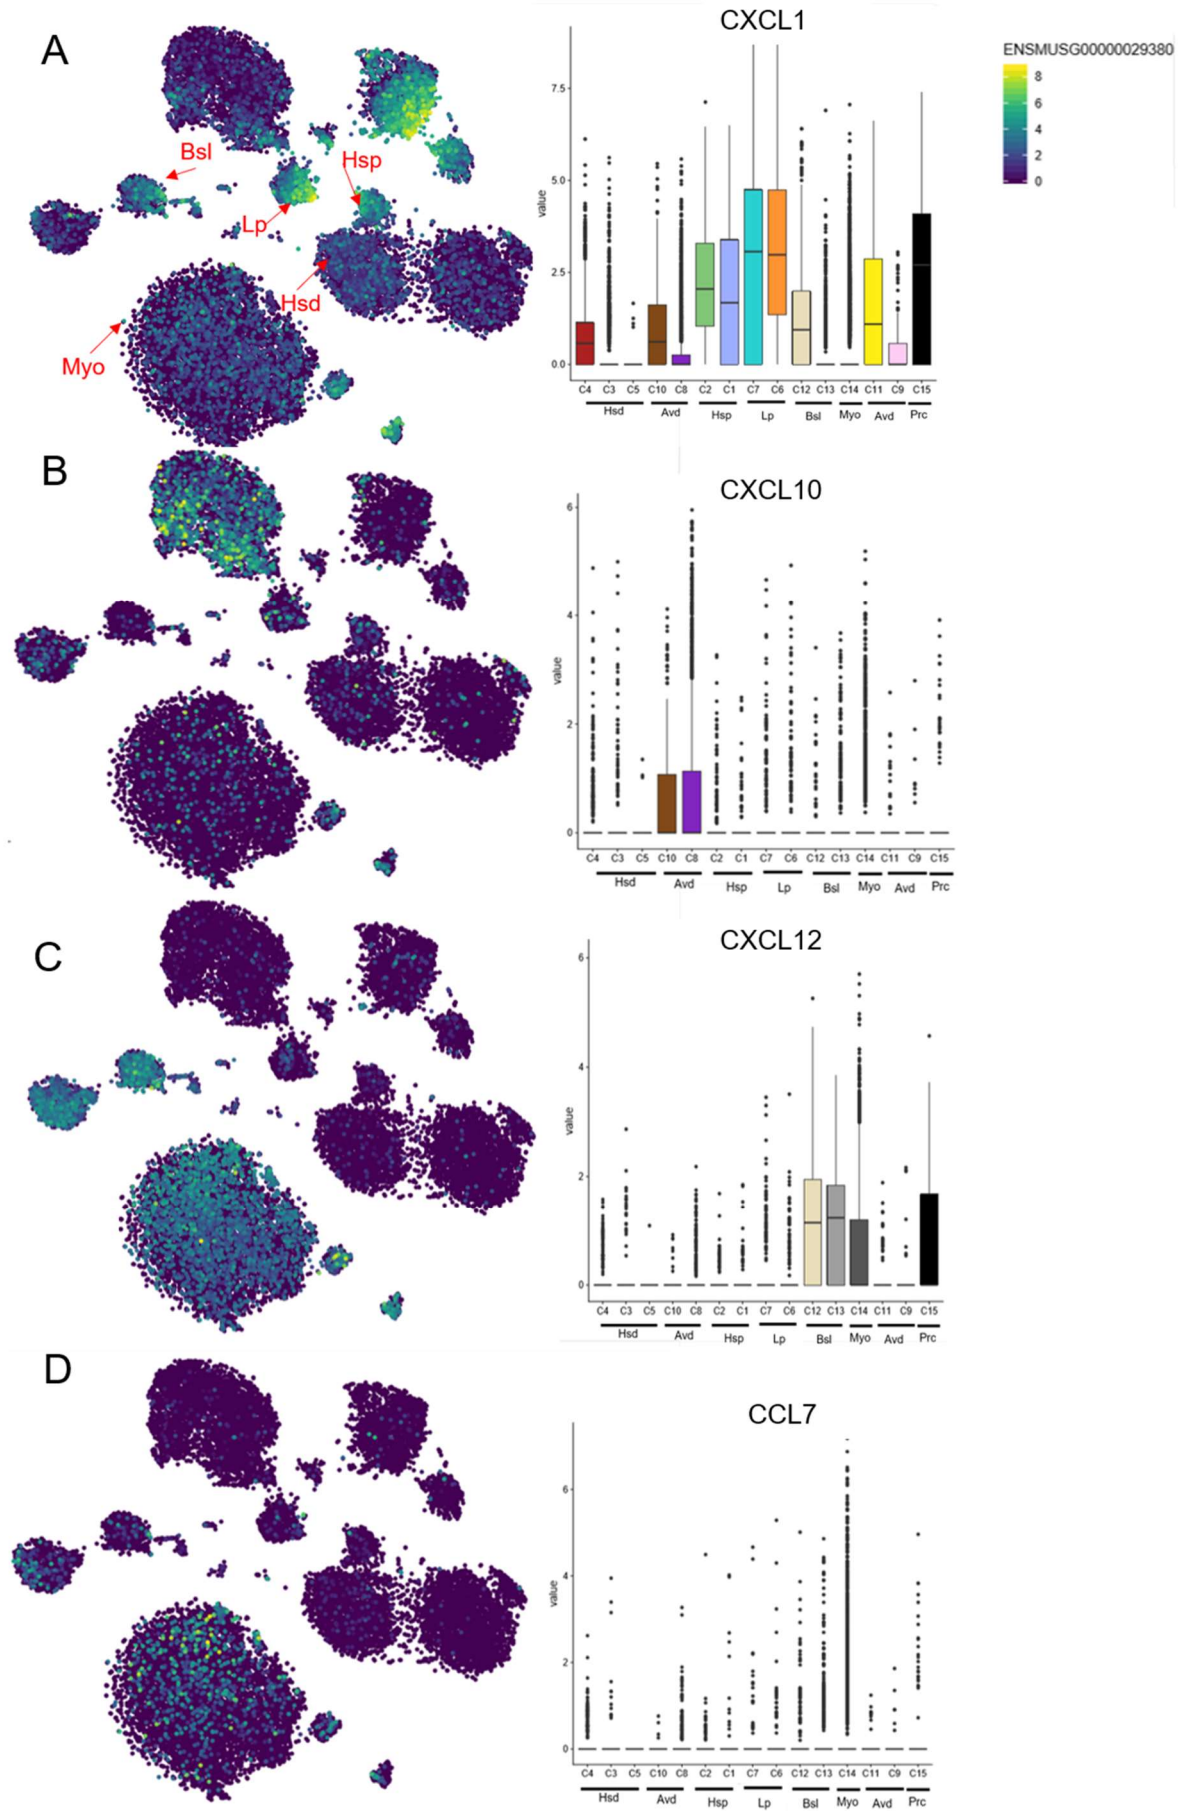

**Figure S4: Chemokines are produced by epithelial cell subsets.**

Expression of **(A)** CXCL1, **(B)** CXCL10, **(C)** CXCL10 and **(D)** CCL7 by epithelial cells was determined by searching the single cell RNAseq data repository from Bach *et al*, 2017 (Bach *et al.*, 2017) at: <https://marionilab.cruk.cam.ac.uk/mammaryGland/>. Epithelial subsets include; hormone sensing differentiated (Hsd), differentiated alveolar (Avd), hormone sensing progenitor (Hsp), luminal progenitor (Lp), basal (Bsl), myoepithelium (Myo), Procr+ (Prc).

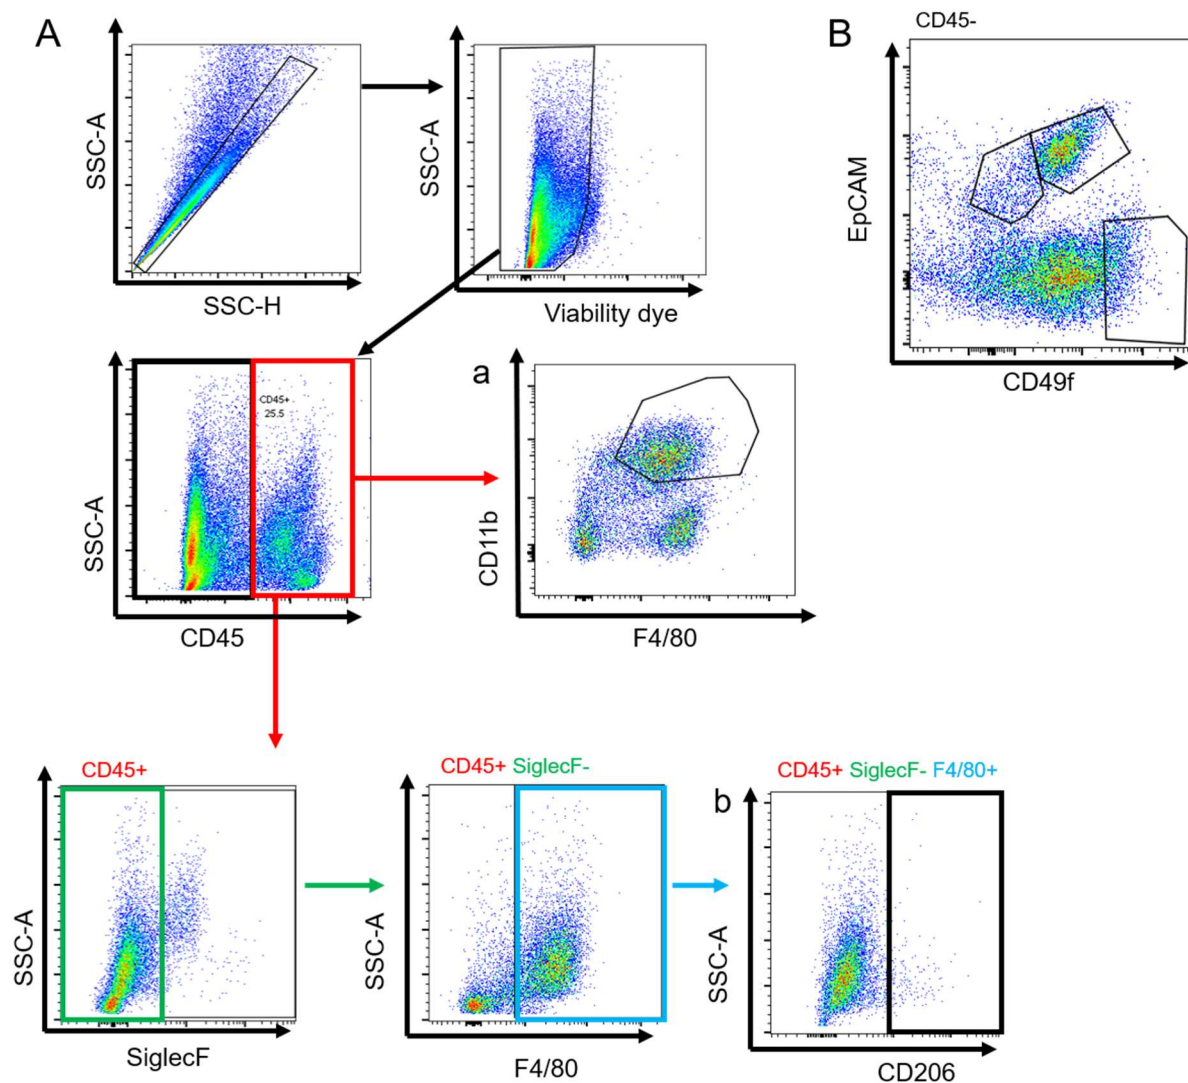

**Figure S5: Gating strategy to define immune and epithelial cells in the mammary gland.**

Flow cytometry was carried out to measure the percentage of cells in the mammary gland. Initially, single cells were gated, dead cells were excluded, and CD45+ immune cells were gated. Populations were then expressed as a percentage of CD45+ cells, including; **(A) a)** CD11b+F4/80+, and **b)** SiglecF-F4/80+CD206+ cells. **(B)** For epithelial cell subsets, live, single CD45- cells were gated. Populations were then expressed as a percentage of CD45- cells, including mature (EpCAM+ CD49f-) and progenitor luminal (EpCAM+ CD49f+), and basal (EpCAM - CD49f+) cells.

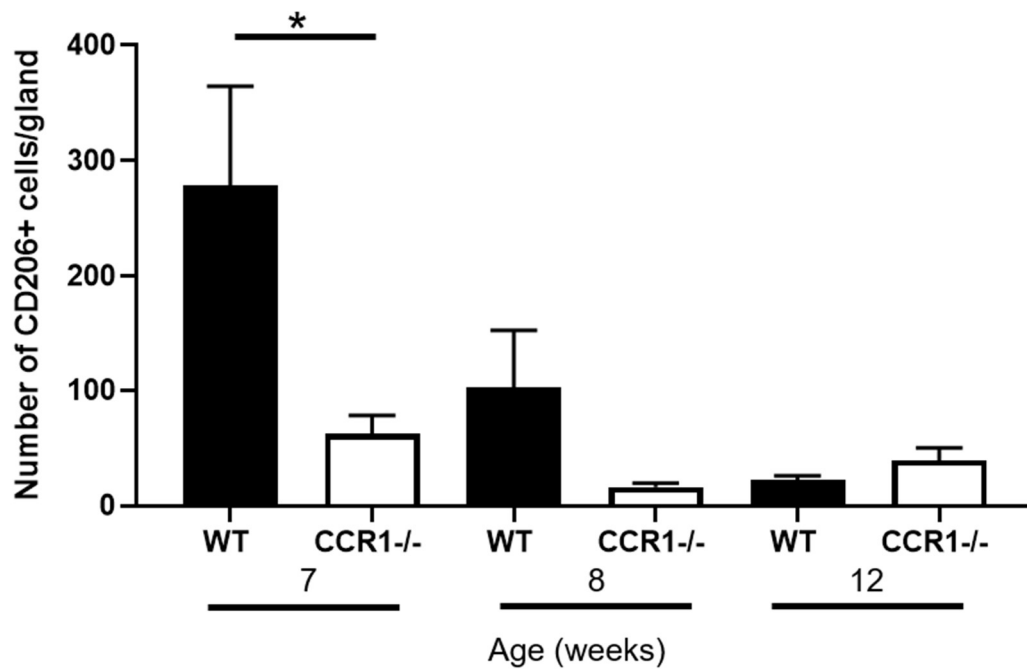

**Figure S6: CD206+ macrophages throughout development.** Flow cytometry was used to determine the number of SiglecF- F4/80+ CD206+ macrophages, within 7 (each group, n=6), 8 and 12 (WT, n=4 CCR1<sup>-/-</sup>, n=5) weeks old developing mammary glands. Significantly different results are indicated. Mann-Whitney test, p=0.0152. Error bars represent S.E.M.

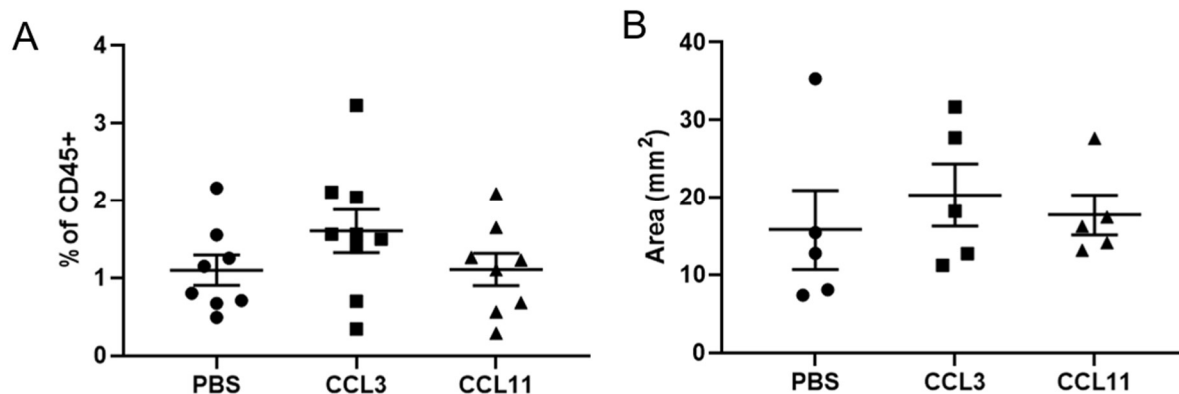

**Figure S7: CCL3 and CCL11 do not control CD206+ macrophages or the extent of branching morphogenesis.** 3 days after subcutaneous administration of PBS, 2  $\mu$ g CCL3 or CCL11 at 6 weeks, **(A)** the percentage of SiglecF-F4/80+CD206+ cells measured by flow cytometry. (PBS, n=8, CCL11, n=8, CCL3, n=9) and **(B)** the area of branching was measured using Image J (each group, n=5).

**Table S1: Pubertal onset in CCR1<sup>-/-</sup> mice**

| Day*                | 38           | 42           | 45           |
|---------------------|--------------|--------------|--------------|
| WT                  | 9/11 (81.8%) | 11/11 (100%) | 11/11 (100%) |
| CCR1 <sup>-/-</sup> | 5/8 (62.5%)  | 7/8 (87.5%)  | 8/8 (100%)   |

\*Pubertal onset determined by assessing vaginal opening.
